# Supplementary material
Source: PubMed Central journal article supplement (PMC2680191)
Supplement: NIHMS93195-supplement-IOVS-551S.pdf [file NIHMS93195-supplement-IOVS-551S.pdf]

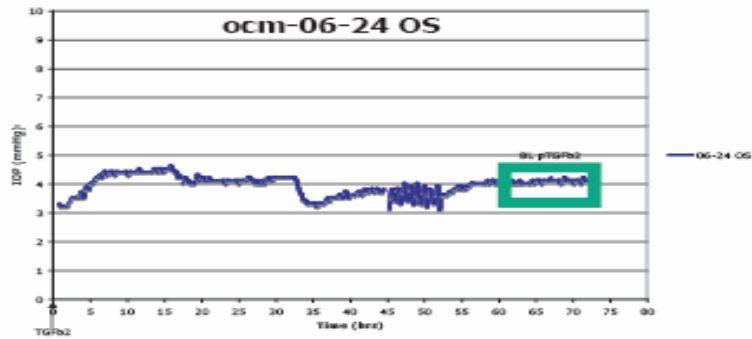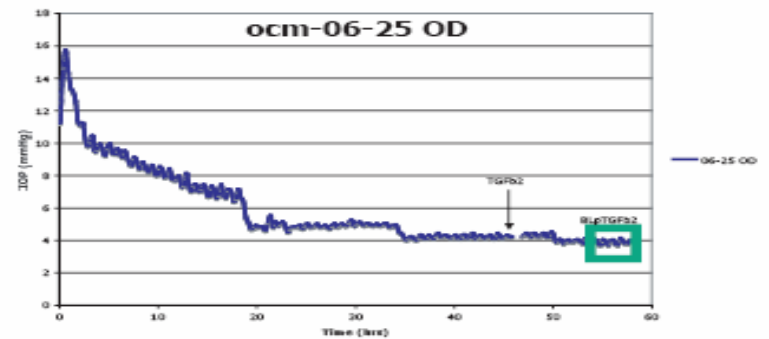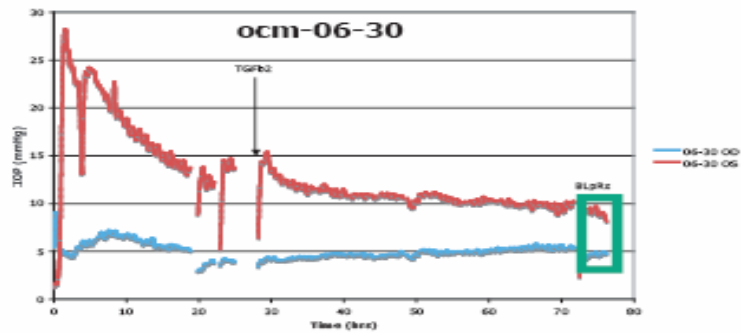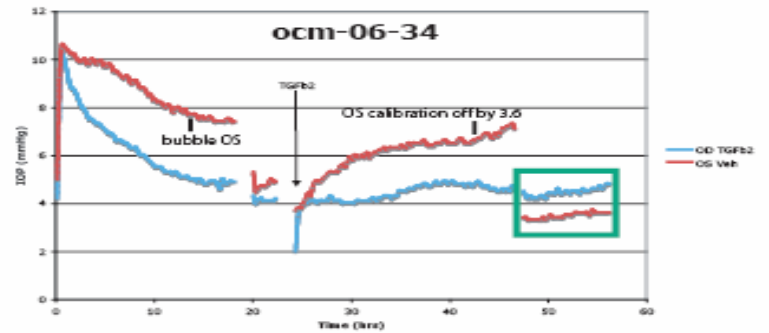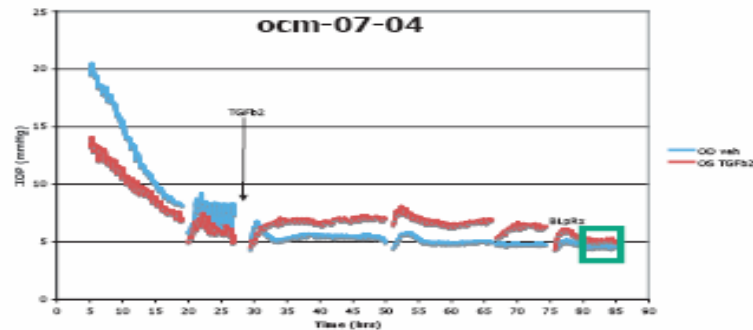

Supplementary Figure S1: Intraocular pressure (IOP) in individual MOCAS from set up to baseline post TGF $\beta$ 2 treatment.

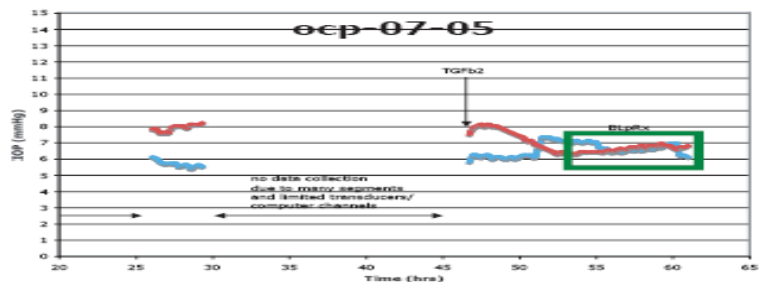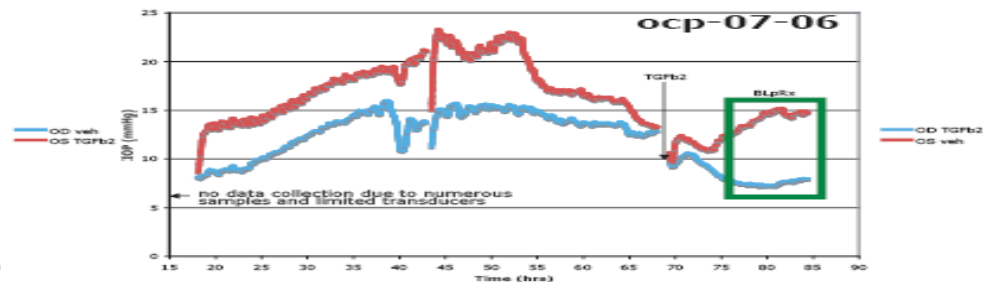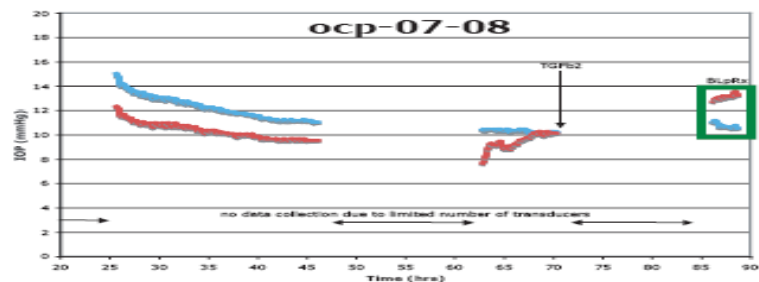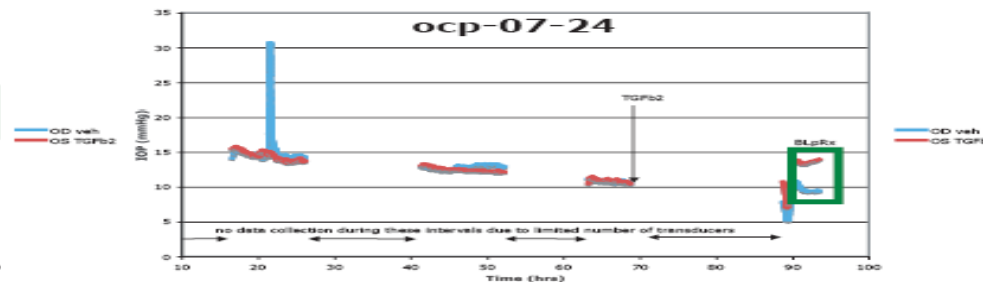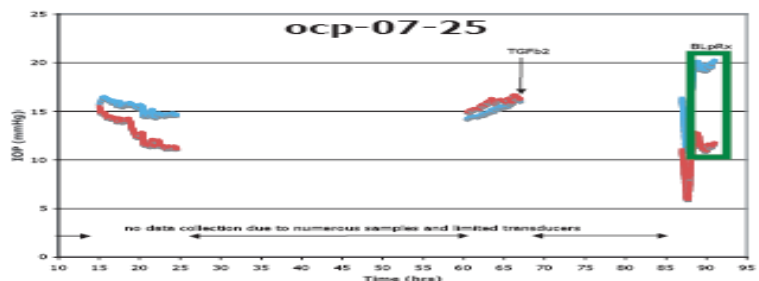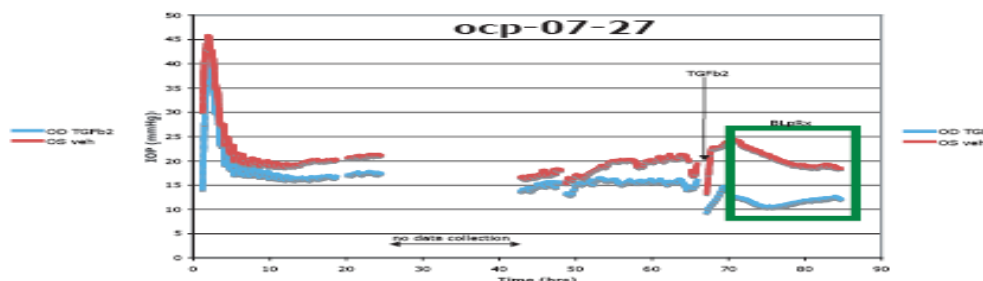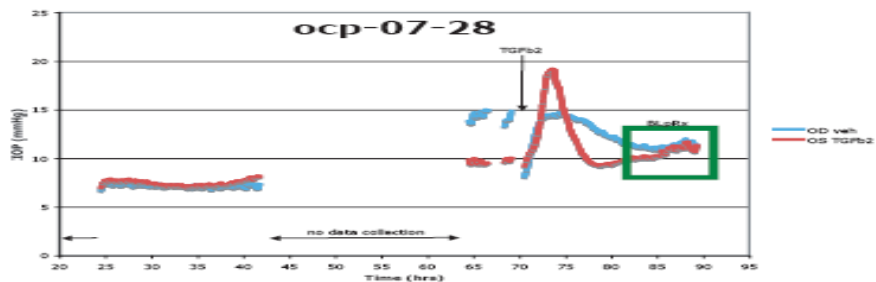

Supplementary Figure S2. Intraocular pressure (IOP) data for individual POCAS from set up to post TGF $\beta$ 2 treatment baseline.

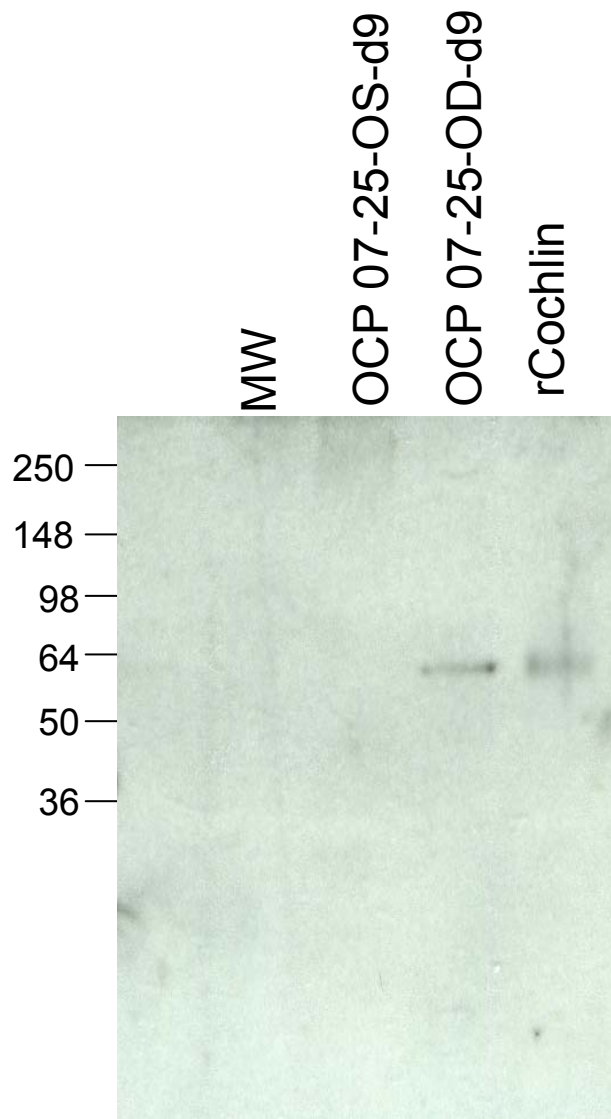

Supplementary Figure S3: A representative Western analysis for cochlin in media samples from POCAS after TGFβ2 treatment. The results obtained from anterior segment cultures: OCP-07-25-OS (BSA treated) and OCP-07-25-OS (TGFβ2 treated) with days in culture as indicated. Approximately 10 μg of protein from media and recombinant purified cochlin (rCochlin; ~300 ng) were loaded and probed with anti-cochlin antibody (hcochlin#1). Molecular weight markers (MW) are as indicated.
